# Supplementary material
Source: Springer Nature journal article supplement (https://www.springermedizin.de/resource/supplementary/12906_2013_2132_MOESM1_ESM.pdf/9522058)

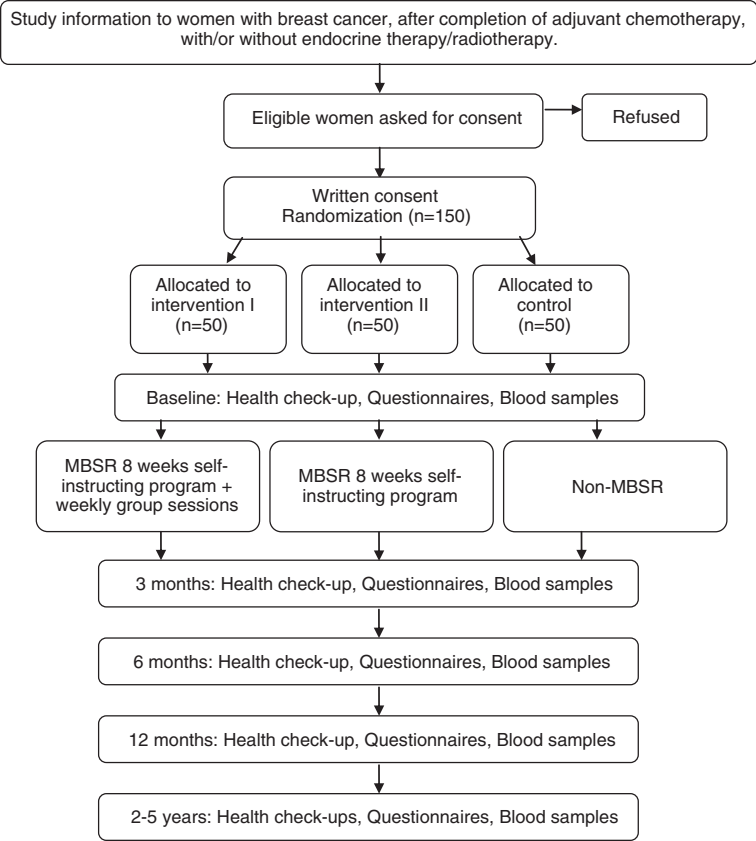

Supplement: MOESM1 [file 9522058]
